# Supplementary material
Source: PubMed Central journal article supplement (PMC7784979)
Supplement: 41431_2020_659_MOESM4_ESM.pdf [file 41431_2020_659_MOESM4_ESM.pdf]

| <b>Primers used to study orientation of duplications (classical PCR)</b>          |                                    |
|-----------------------------------------------------------------------------------|------------------------------------|
| RERE-int2F                                                                        | F : 5'-CTGTAGTCCTAGCTACTTGG        |
| RERE-int2R                                                                        | R : 5'-ATGGCTTGAAGTAGGTAAGC-3'     |
| ENO1-Ex9F                                                                         | F : 5'-CAATCTGGTTGACTTTGAGC-3'     |
| DDX47-ExtF                                                                        | F: 5'-AGAGGTCAGTGTGGATTACC-3'      |
| DDX47-ExtR                                                                        | R : 5'-CAGGATGATTCTCCAGTTCC-3'     |
| TBC1D24-F                                                                         | F: 5'-TGAAGTGCAGGAACTGAAGC-3'      |
| TBC1D24-R                                                                         | R : 5'-TGGAAGAACTTGAGGATGGC-3'     |
| <b>Primers used to study transcripts expression in human cDNA (classical PCR)</b> |                                    |
| RERE                                                                              | F : 5'-GAGTGATCACAGTGAAGACG        |
|                                                                                   | R : 5'-GCAGGAGTTGGAGATCTGC-3'      |
| ENO1                                                                              | F : 5'-CACTGATAAGGTGGTCATCG-3'     |
|                                                                                   | R : 5'-GCAGGACTTCTCGTTCACG-3'      |
| DDX47                                                                             | F : 5'-CATTCTTCTAGCAACTGACG-3'     |
|                                                                                   | R : 5'-GTTCTGTCAGCATCATAACC-3'     |
| <b>Primers used to quantify transcripts expression in patient's cDNA (qPCR)</b>   |                                    |
| RERE                                                                              | F : 5'-TAGCATTCAAGACTTCAAAGTGGT-3' |
|                                                                                   | R : 5'-CGGCTTCAGAAAGATGCTGT-3'     |
| ENO1                                                                              | F : 5'-TCCCAACATCCTGGAGAATAA-3'    |
|                                                                                   | R : 5'-TGGACATGGTGAAGTTCTGG-3'     |
| DDX47                                                                             | F : 5'-CATTCTTCTAGCAACTGACG-3'     |
|                                                                                   | R : 5'-GTTCTGTCAGCATCATAACC-3'     |
| GAPDH                                                                             | F : 5'-TGTGTCCGTCGTGGATCTGA-3'     |
|                                                                                   | R : 5'-CCTGCTTCACCACCTTCTTGA-3'    |
| <b>Primers used to quantify transcripts expression in rat's cDNA (qPCR)</b>       |                                    |
| Rere                                                                              | F: 5'-AGGATCCTCTCCACCAAGG3'        |
|                                                                                   | R : 5'-CTAAGTGAGGGCCAGCAGTC-3'     |
| Eno1                                                                              | F : 5'-GCGCTCACGTTTGTCTTA-3'       |
|                                                                                   | R : 5'-TGGACATGGTGAAGTTCTGG-3'     |
