# Supplementary material
Source: PubMed Central journal article supplement (PMC7784979)
Supplement: 41431_2020_659_MOESM5_ESM.pdf [file 41431_2020_659_MOESM5_ESM.pdf]

| <b>CNV type</b> | <b>cytogenic bands</b> | <b>start (Hg38)</b> | <b>end (Hg38)</b> | <b>size (bp)</b> | <b>known genes</b>                                      | <b>status</b>          |
|-----------------|------------------------|---------------------|-------------------|------------------|---------------------------------------------------------|------------------------|
| loss            | 1q21.2                 | 150170293           | 150173653         | 3360             | -                                                       | nd                     |
| loss            | 6p12.1                 | 53026718            | 53035057          | 8339             | ICK                                                     | maternal inherited     |
| gain            | 11q13.2                | 68816505            | 69506329          | 689824           | LRP5, PPP6R3, GAL, MTL5, CPT1A, MRPL21, IGHMBP2, MRGPRF | maternal inherited     |
| gain            | 1p36.23                | 8663239             | 8864067           | 200828           | RERE, ENO1                                              | not maternal inherited |
| gain            | 12p13.1                | 12797985            | 12842155          | 44170            | DDX47                                                   | not maternal inherited |
